# Supplementary material for: PRL-2 phosphatase is required for vascular morphogenesis and angiogenic signaling
Source: PubMed Central journal article supplement (PMC7584612; doi:10.1038/s42003-020-01343-z), 2020-10-23
Supplement: 42003_2020_1343_MOESM1_ESM.pdf [file 42003_2020_1343_MOESM1_ESM.pdf]

# Supplementary Fig. 1

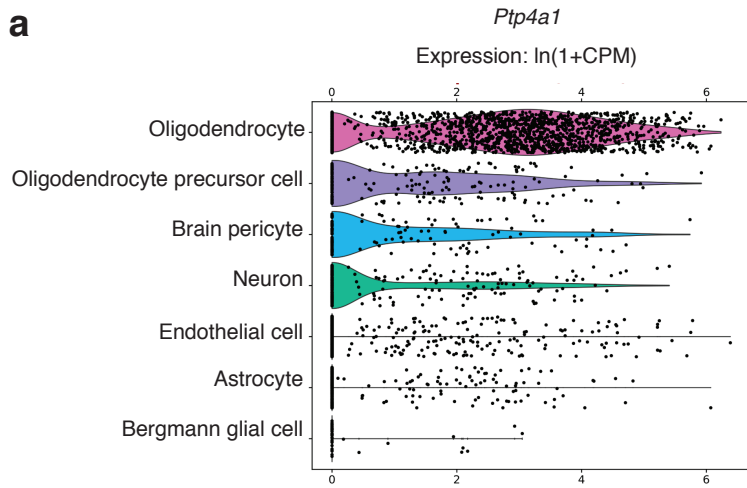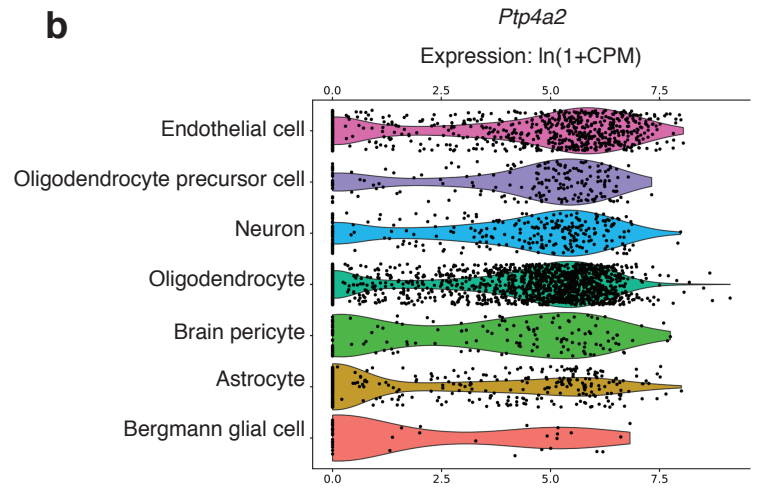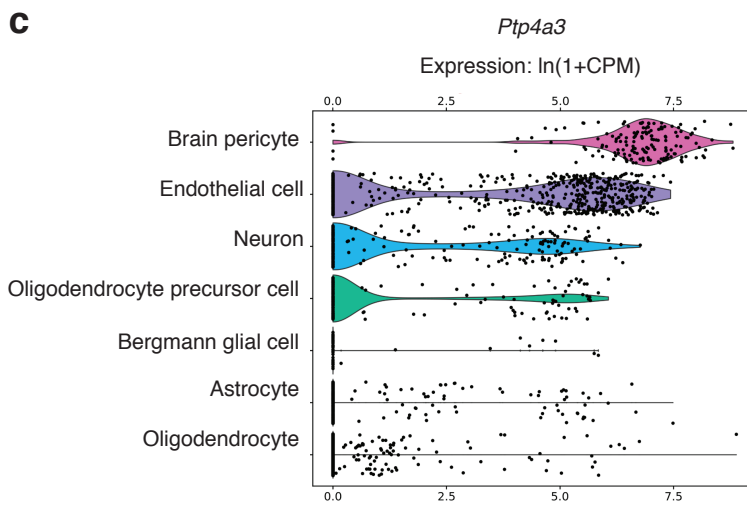

**d**

|               | Endothelial cell expression<br>$\ln(1+CPM)$ |        |
|---------------|---------------------------------------------|--------|
|               | Mean                                        | Median |
| <i>Ptp4a1</i> | 0.58                                        | 0.00   |
| <i>Ptp4a2</i> | 4.13                                        | 5.11   |
| <i>Ptp4a3</i> | 2.94                                        | 3.28   |

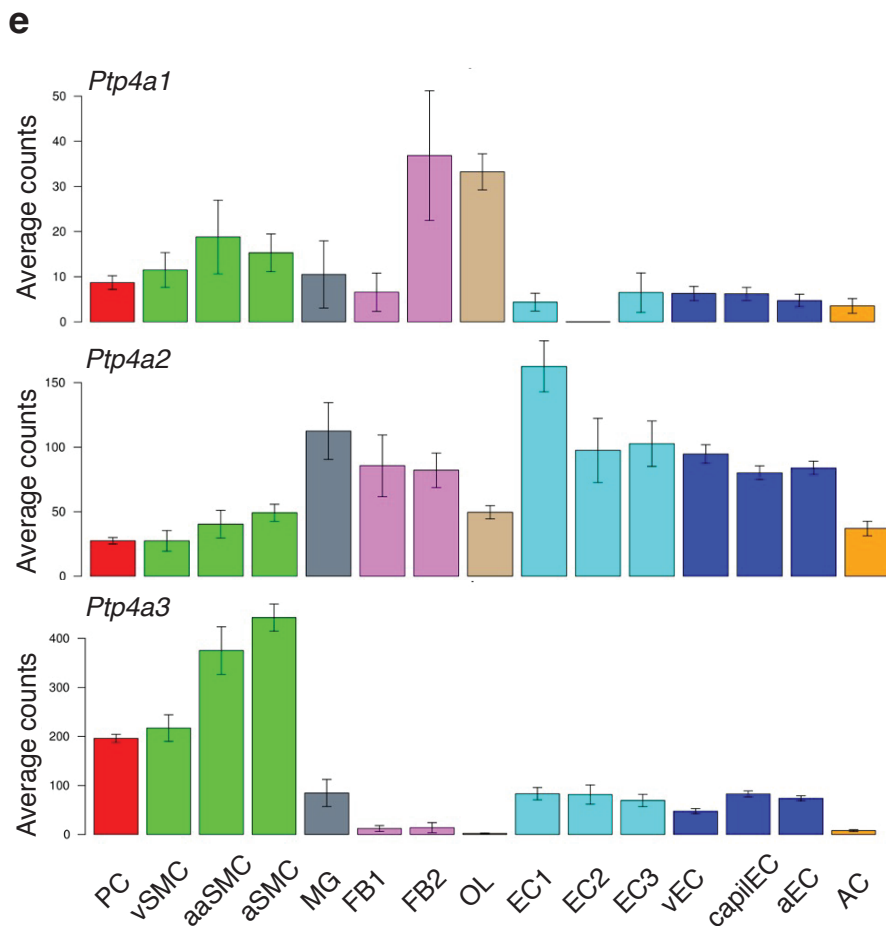

**f**

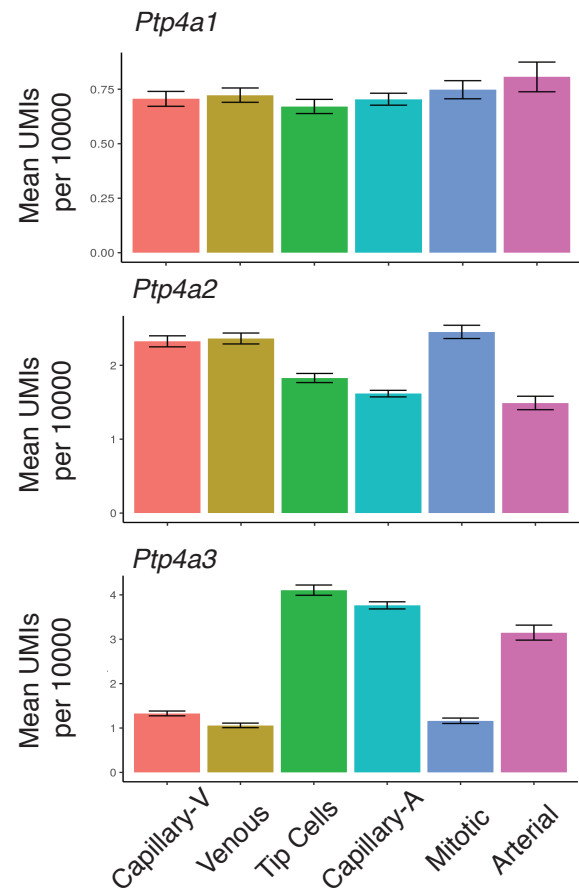

**Supplementary Fig.1:** (a) Analysis of Ptp4a1-3 expression single-cell transcriptomic data from the model organism *Mus musculus* (searchable database Tabula Muris <https://tabula-muris.ds.czbiohub.org/>)<sup>52</sup>. PRLs expression for each cell type sorted by FACS in brain (non-myeloid cells) can be visualized with violin plots. (b) Analysis of Ptp4a1-3 expression in the single cell RNA sequencing dataset<sup>53,54</sup>. (searchable database: <http://betsholtzlab.org/VascularSingleCells/database.html>) Average expression in each cluster [Brain data] PC - Pericytes; SMC - Smooth muscle cells; MG - Microglia; FB - Vascular fibroblast-like cells; OL - Oligodendrocytes; EC - Endothelial cells; AC - Astrocytes; v - venous; capil - capillary; a - arterial; aa - arteriolar; 1,2,3- subtypes. (c) Analysis of Ptp4a1,2,3 expression in Vascular Endothelial Cell Trans-omics Resource Database (VECTRDB) (<https://markfsabbagh.shinyapps.io/vectrdb/>)<sup>55</sup>. PRLs gene expression in the developing CNS at single cell resolution. Single-cell RNA-seq on 3,946 FACS-purified GFP-positive endothelial cells from a P7 *Tie2-GFP* mouse brain. This dataset allow assesment Ptp4a1-3 expression in arterial, venous, capillary, mitotic, and tip subtypes of brain endothelial cells.

## Supplementary Fig. 2

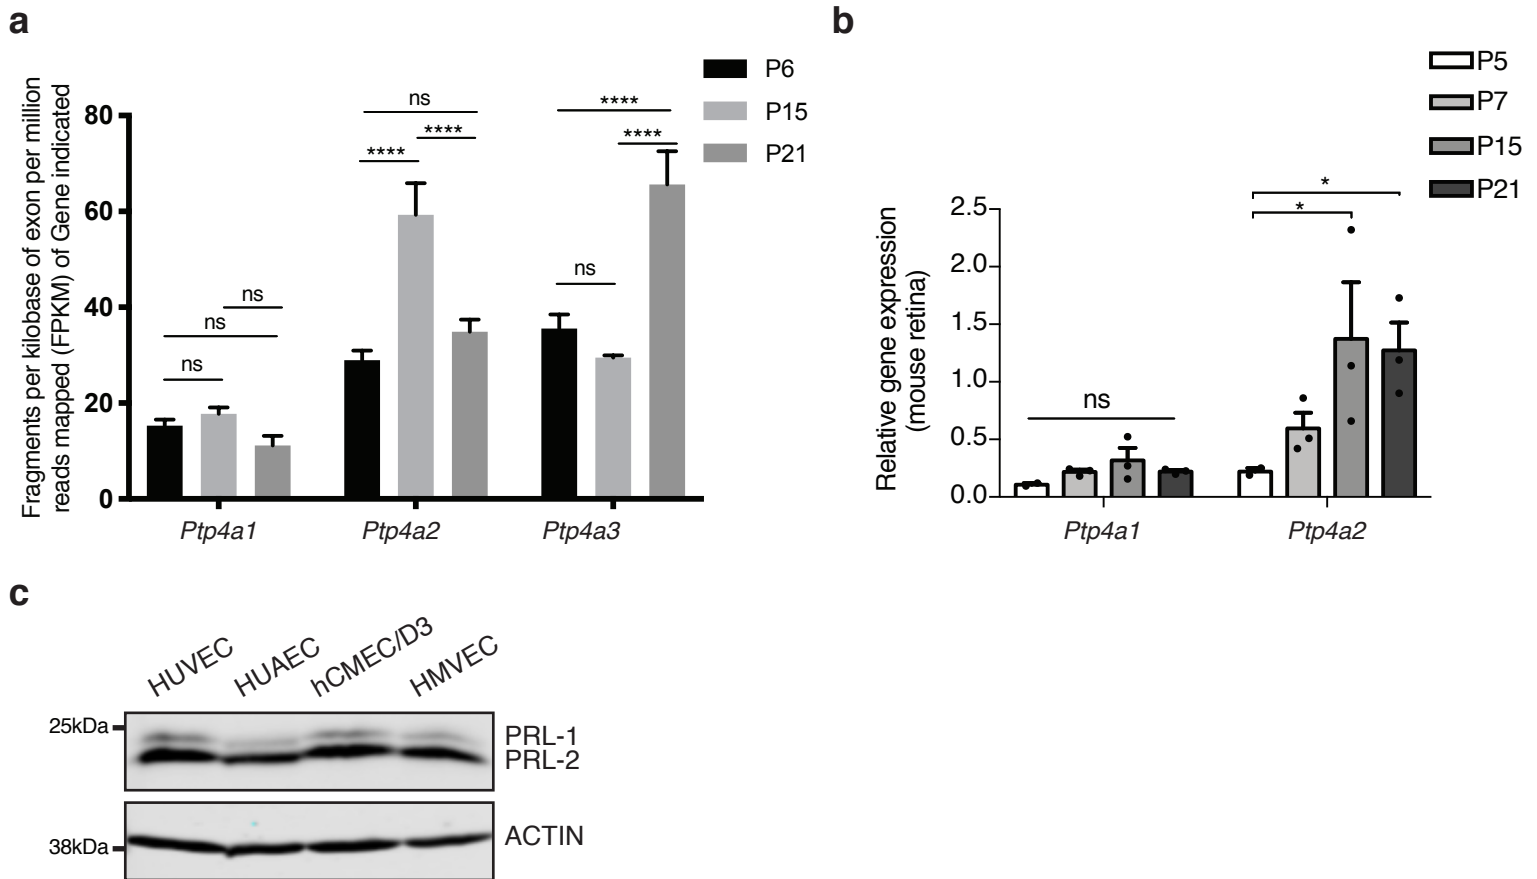

**Supplementary Fig.2:** (a) Analysis of online bulk RNA sequencing data from P6 to P21 mouse retinal endothelial cells<sup>56</sup> (Two-way ANOVA: \*p-value<0.05, \*\*p-value<0.01, \*\*\*:p-value<0.001, ns: non-significant p-value>0.05). (b) qPCR analysis of mRNA isolated from whole mouse retina. Each individual data point represents a mouse (average of 2 retinas) (Two-way ANOVA: \*p-value<0.05, ns: non-significant p-value>0.05). Error bars represent mean  $\pm$  s.e.m. (c) Western-blot of several primary endothelial cell lines. Human Umbilical Vein Cell (HUVEC), Human Umbilical Artery Cell (HUAEC), Human Cerebral Microvascular Endothelial Cell (hCMEC/D3), Lung microvascular cells (HMVEC).

### Supplementary Fig. 3

a

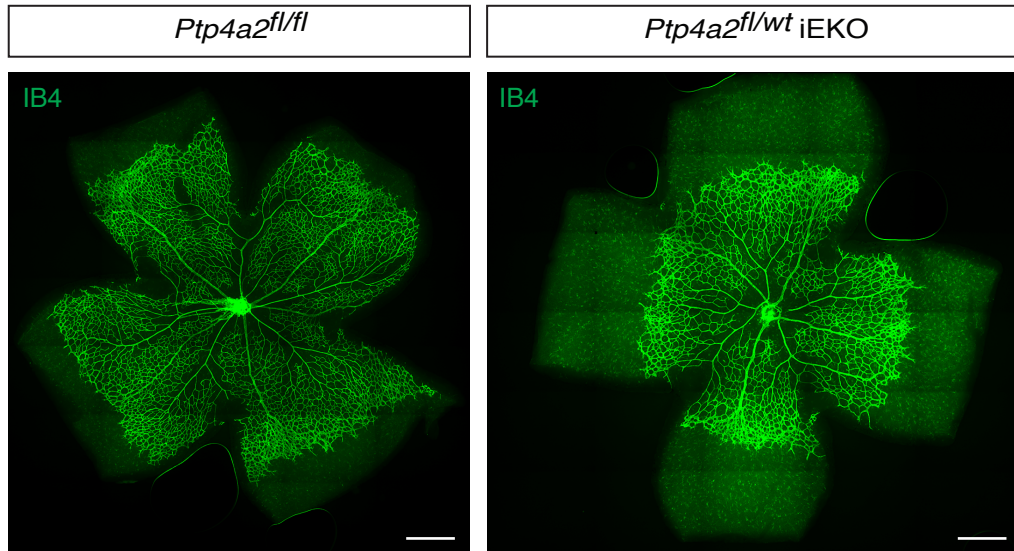

b

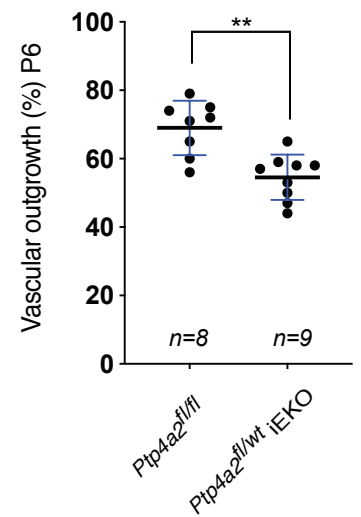

**Supplementary Fig.3:** (a) Retina whole-mount staining with isolectin B4 and (b) vascular outgrowth quantification in P6 *Ptp4a2<sup>fl/wt</sup>* and *Ptp4a2<sup>fl/wt</sup>iEKO*. (Mann-Whitney U test: \*\*: p-value<0.02). Each individual data point represents a mouse (average of 2 retinas). Error bars represent mean  $\pm$  s.e.m. Scale bar: 500um

## Supplementary Fig. 4

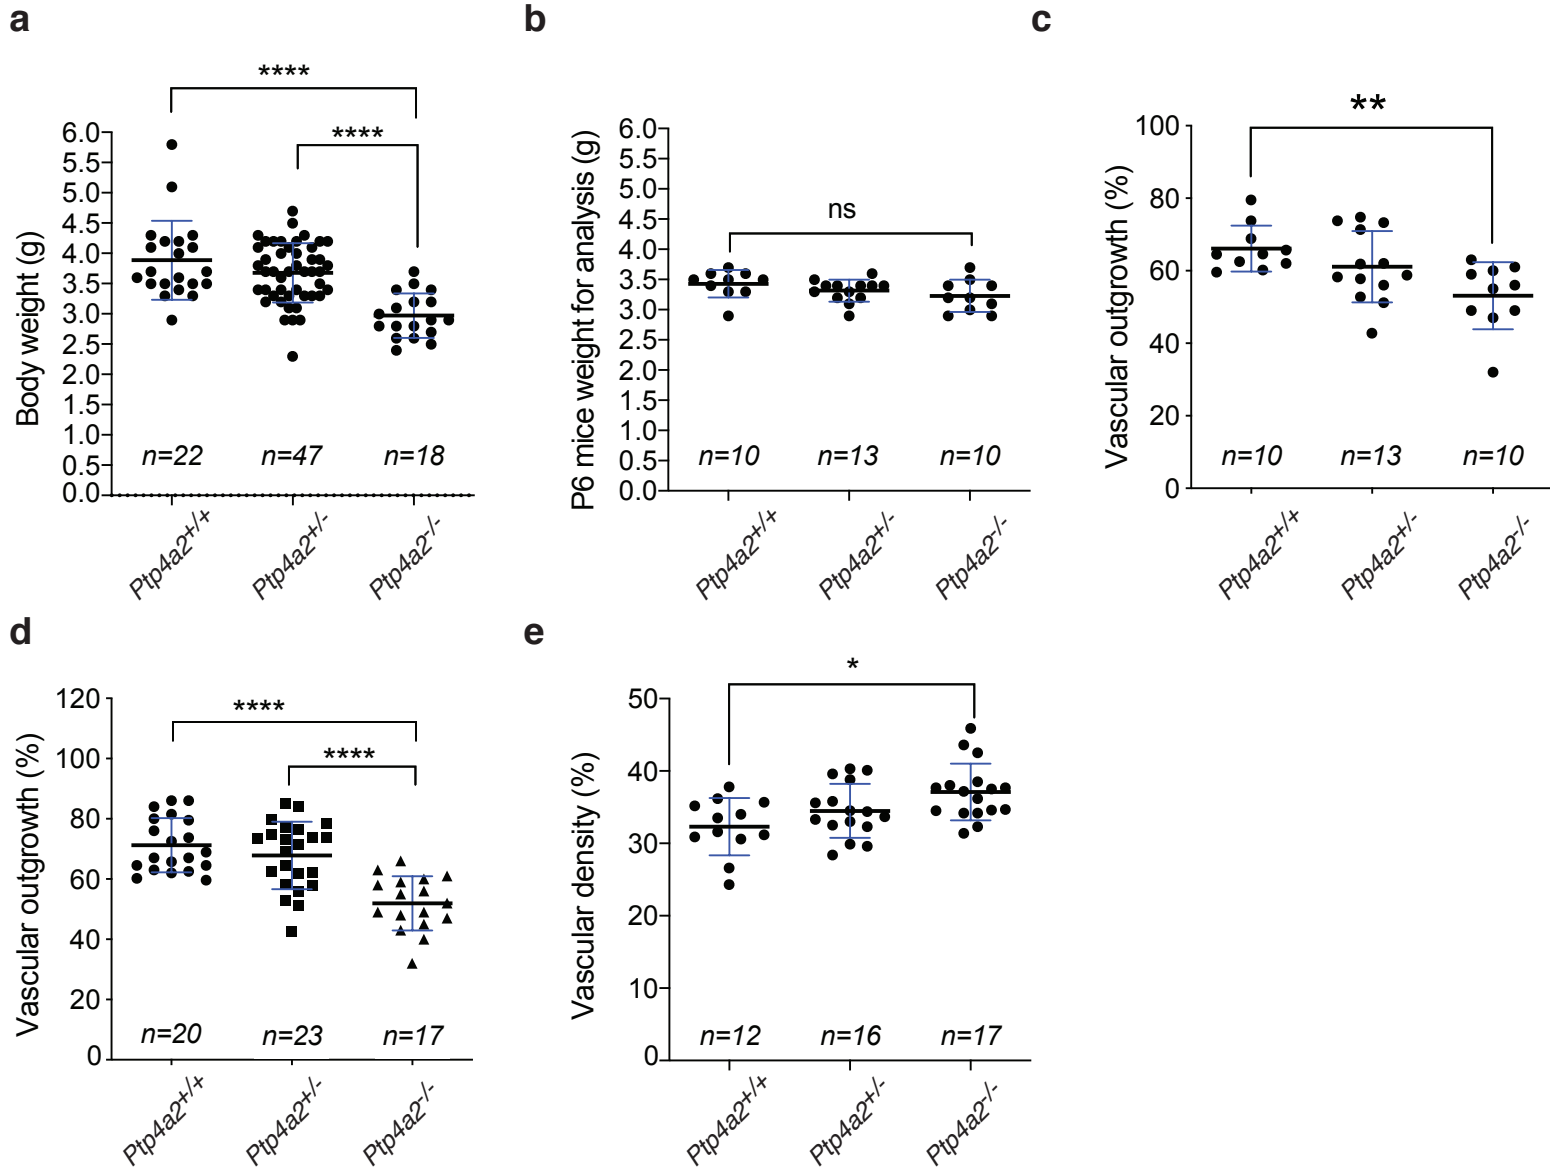

**Supplementary Fig.4:** (a) Body weight analysis of P6 *Ptp4a2*<sup>+/+</sup>, *Ptp4a2*<sup>+/-</sup> and *Ptp4a2*<sup>-/-</sup> mice. (One-way ANOVA: \*\*\*\*p-value<0.0001 ns: non-significant p-value>0.05) (b) Weight of mice selected for analysis on (c) (One-way ANOVA: ns: non-significant p-value>0.05). (c) Vascular outgrowth quantification of P6 *Ptp4a2*<sup>+/+</sup>, *Ptp4a2*<sup>+/-</sup> and *Ptp4a2*<sup>-/-</sup> mice from similar weight (3.25g +/- 0.5g) (One-way ANOVA: \*\*p-value<0.01, ns: non-significant p-value>0.05) (d,e) Vascular outgrowth and vascular density quantification of P6 *Ptp4a2*<sup>+/+</sup>, *Ptp4a2*<sup>+/-</sup> and *Ptp4a2*<sup>-/-</sup> mice which show an intermediate phenotype for *Ptp4a2*<sup>+/-</sup> mice. All mice from all weight were included in this analysis. (One-way ANOVA: \*: p-value<0.05 \*\*\*\*p-value<0.0001) Each individual data point represents a mouse. Error bars represent mean ± s.e.m.

# Supplementary Fig. 5

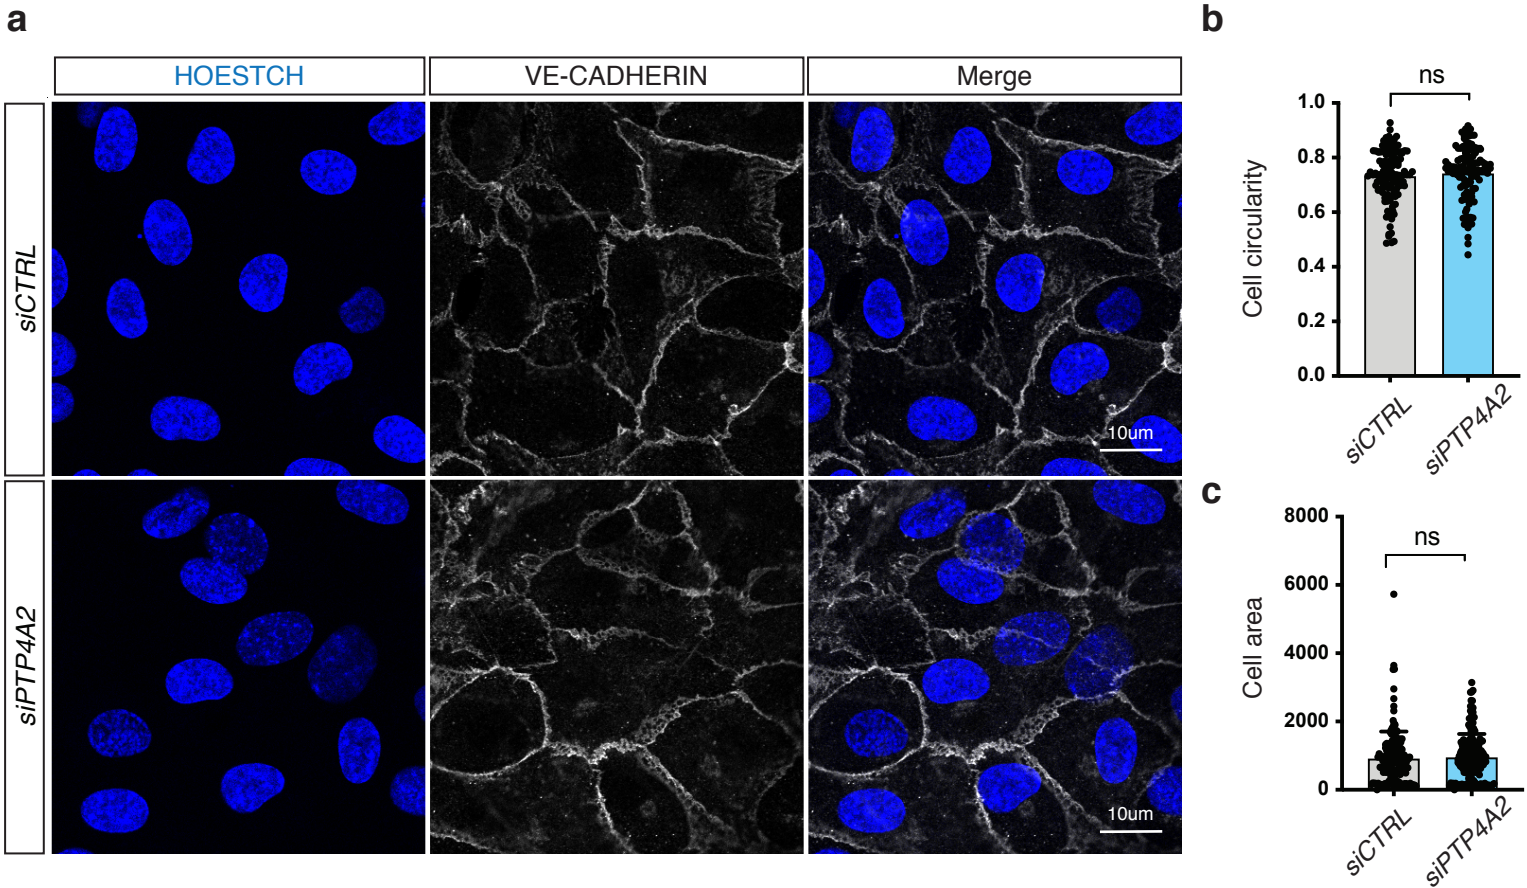

**Supplementary Fig.5:** (a) VE-CADHERIN staining in HUVECs after *siCTRL* or *siPTP4A2* treatment. Hoechst 33342 was applied to stain nuclei. Quantification of cell circularity (b) and cell area (c) of HUVEC after *siCTRL* or *siPTP4A2* treatment. At least 150 cells per group from n=3 independent experiment were analyzed (Mann-Whitney U test: ns: non-significant p-value>0.05).

## Supplementary Fig. 6

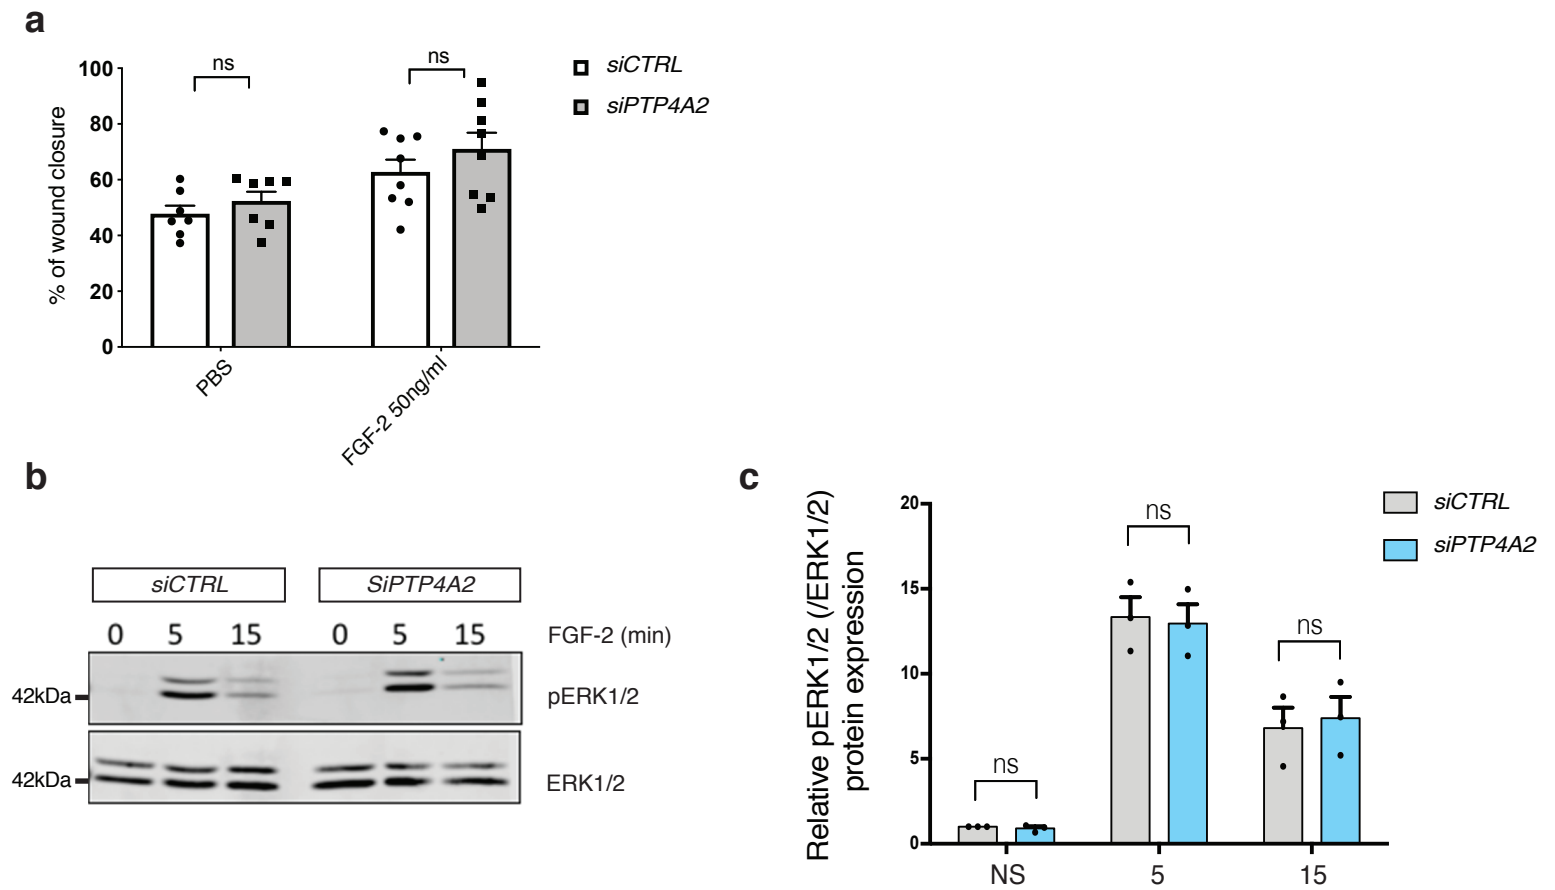

**Supplementary Fig.6:** (a) Scratch-wound assay performed on HUVEC monolayer 16h after scratch and with FGF-2 (50ng/ml). (Two-way ANOVA: ns: non-significant p-value>0.05). Each individual data point represents a biological replicat from n=3 independent experiments (b) Western blot and (c) quantification of HUVEC cells stimulated with FGF-2 after treatment with *siCTRL* or *siPTP4A2*. (Two-way ANOVA: ns: non-significant p-value>0.05). Error bars represent mean  $\pm$  s.e.m.

## Supplementary Fig. 7

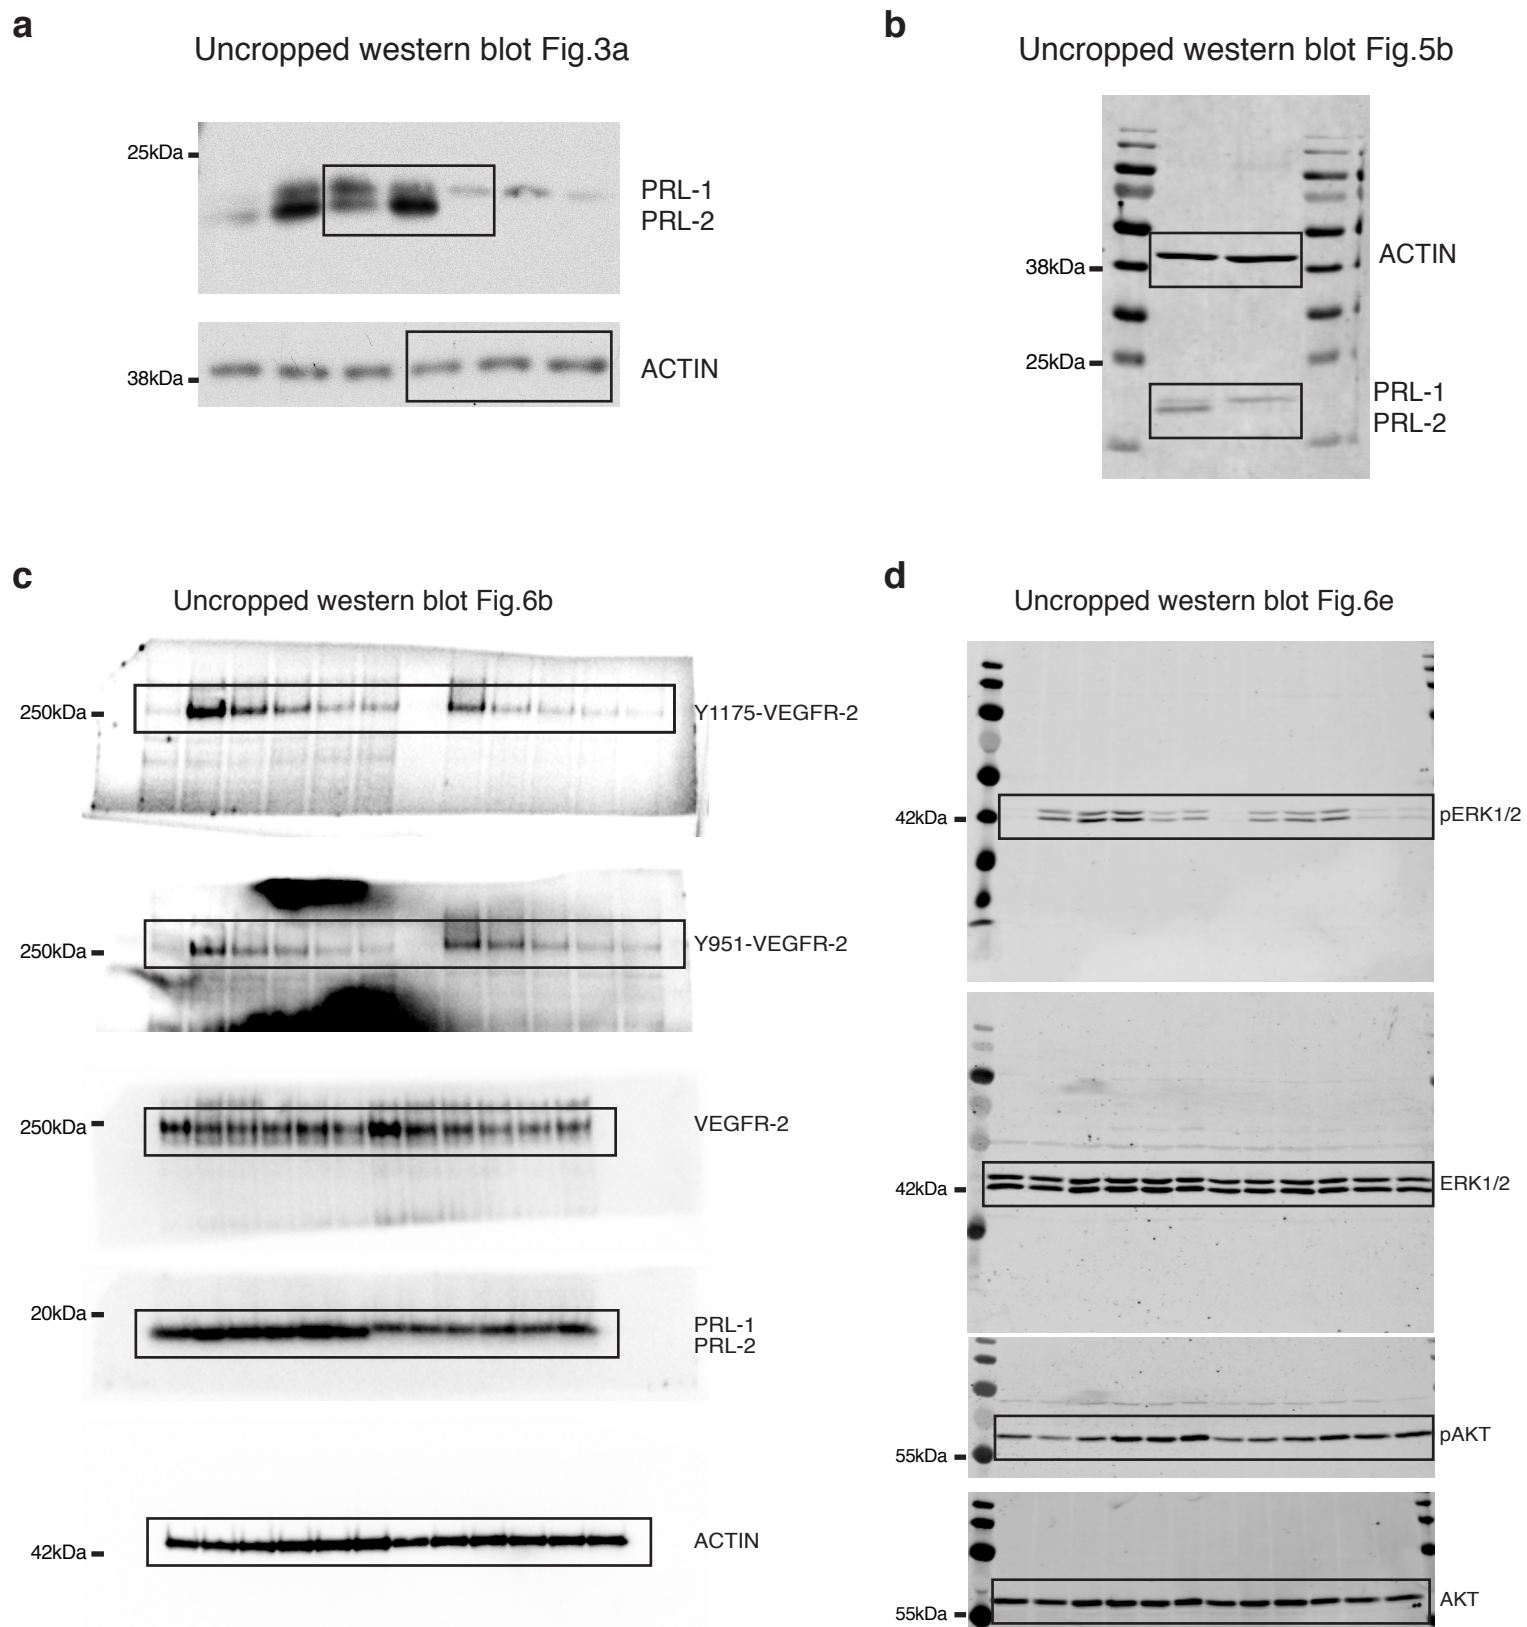

**Supplementary Fig. 7:** Uncropped western blot for (a) Fig.3a, (b) Fig.5b, (c) Fig6b, (d) Fig.6e



## Supplementary Fig. 8

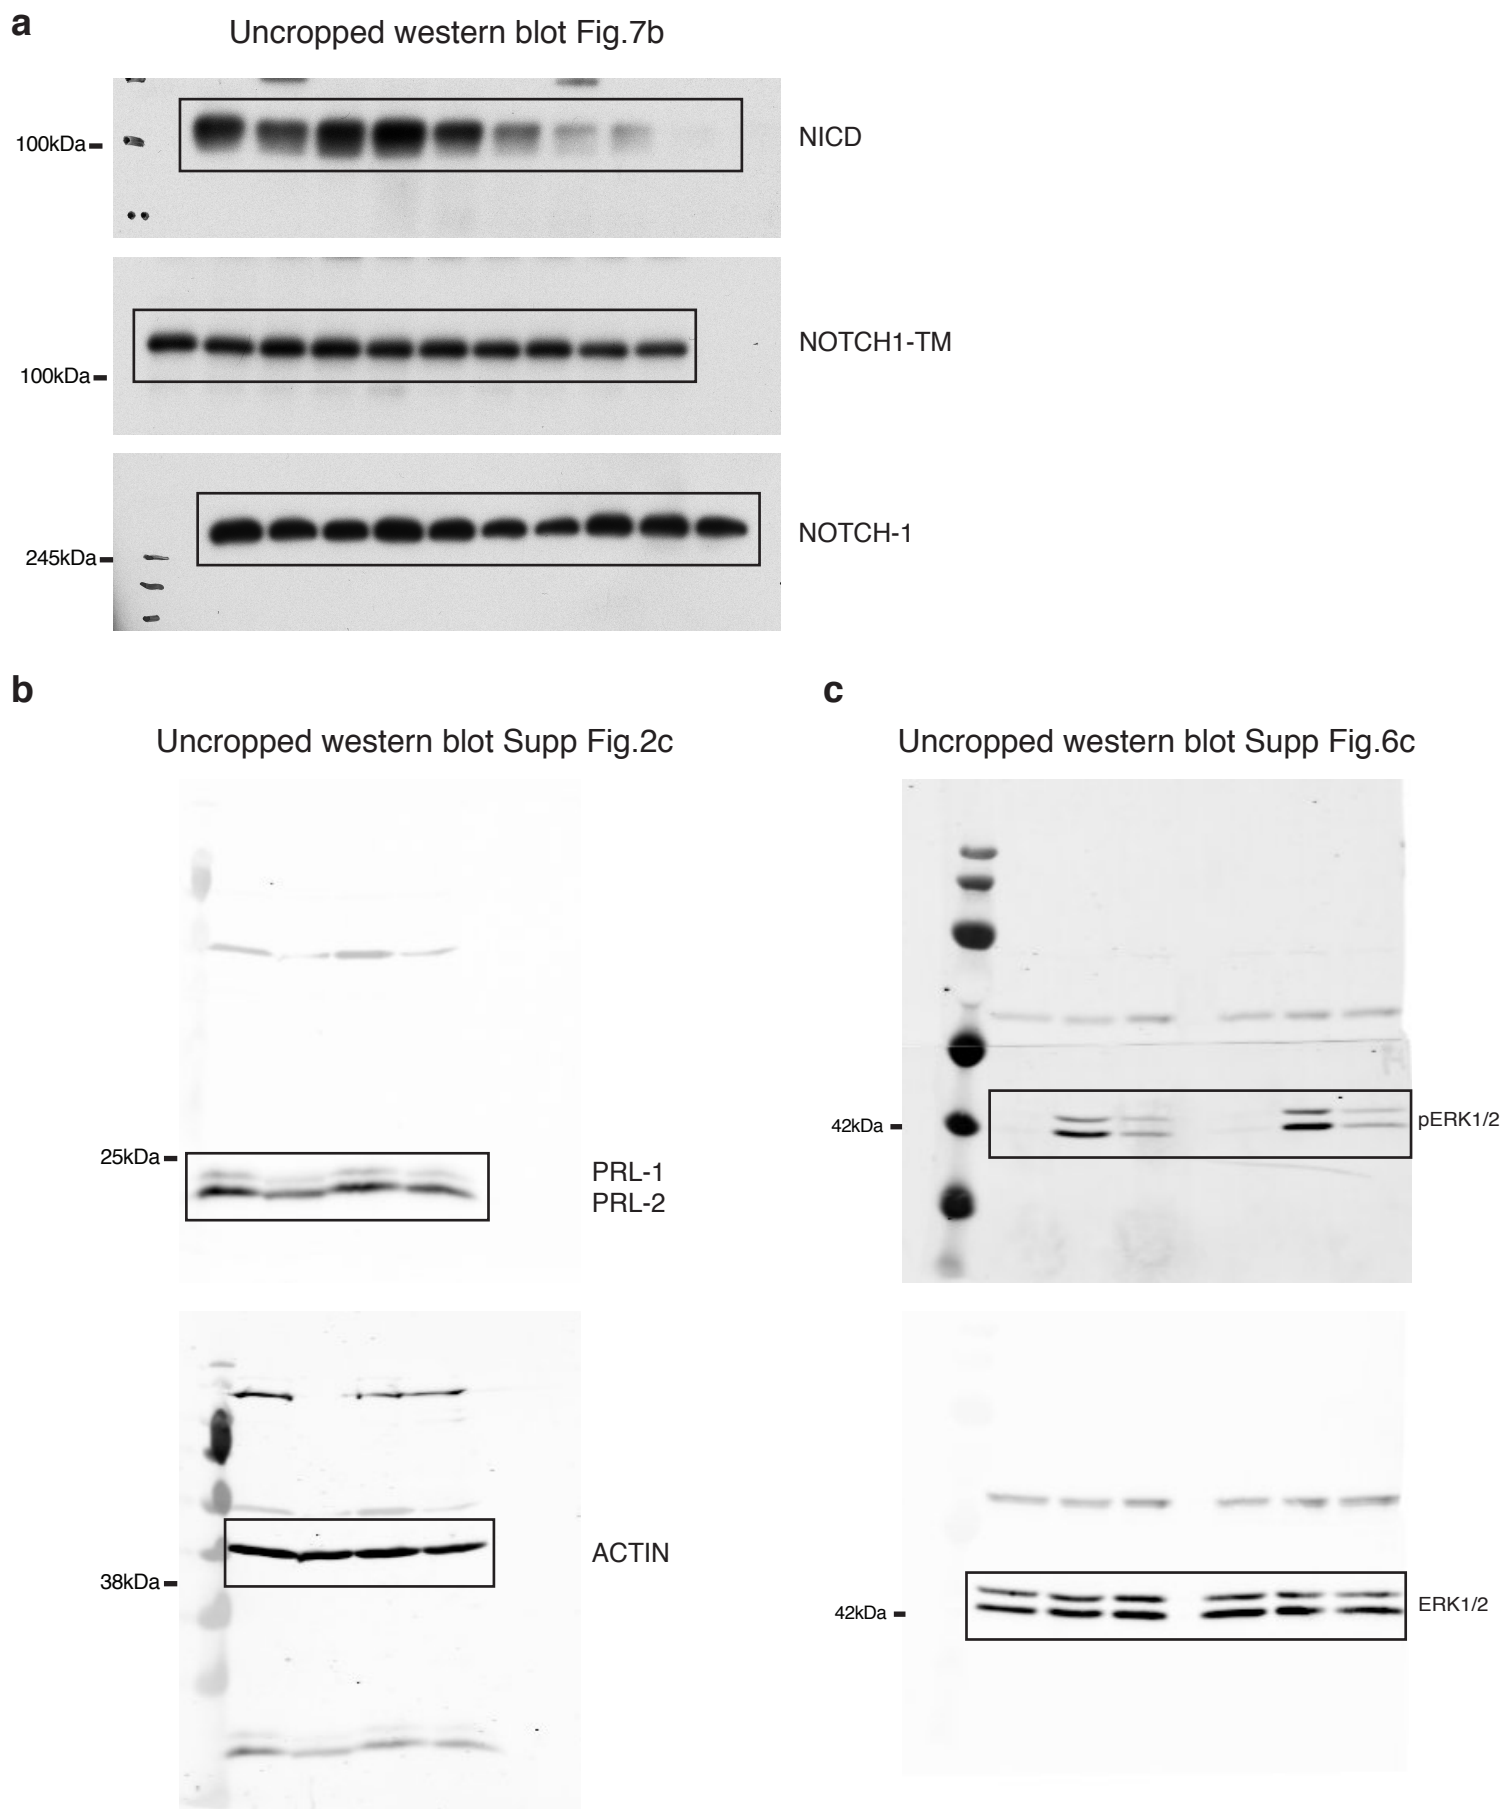

**Supplementary Fig. 8:** Uncropped western blot for (a) Fig.7b, (b) Supp Fig. 2c, (c) Supp Fig. 6c.
