# Supplementary material for: PRL-2 phosphatase is required for vascular morphogenesis and angiogenic signaling
Source: PubMed Central journal article supplement (PMC7584612; doi:10.1038/s42003-020-01343-z), 2020-10-23
Supplement: 42003_2020_1343_MOESM3_ESM.pdf [file 42003_2020_1343_MOESM3_ESM.pdf]

## **Description of Additional Supplementary Files**

File Name: Supplementary Data 1

Description: This file contains the qPCR primer sequence

File Name: Supplementary Data 2

Description: This file contains the raw data of the principal figures
